# Supplementary material for: Adjuvant properties of water extractable arabinoxylans with different structural features from wheat flour against model antigen ovalbumin
Source: Royal Society of Chemistry journal article supplement (doi:10.1039/c5fo01207d), 2016-01-01
Supplement: c5fo01207d1.pdf [file c5fo01207d1.pdf]

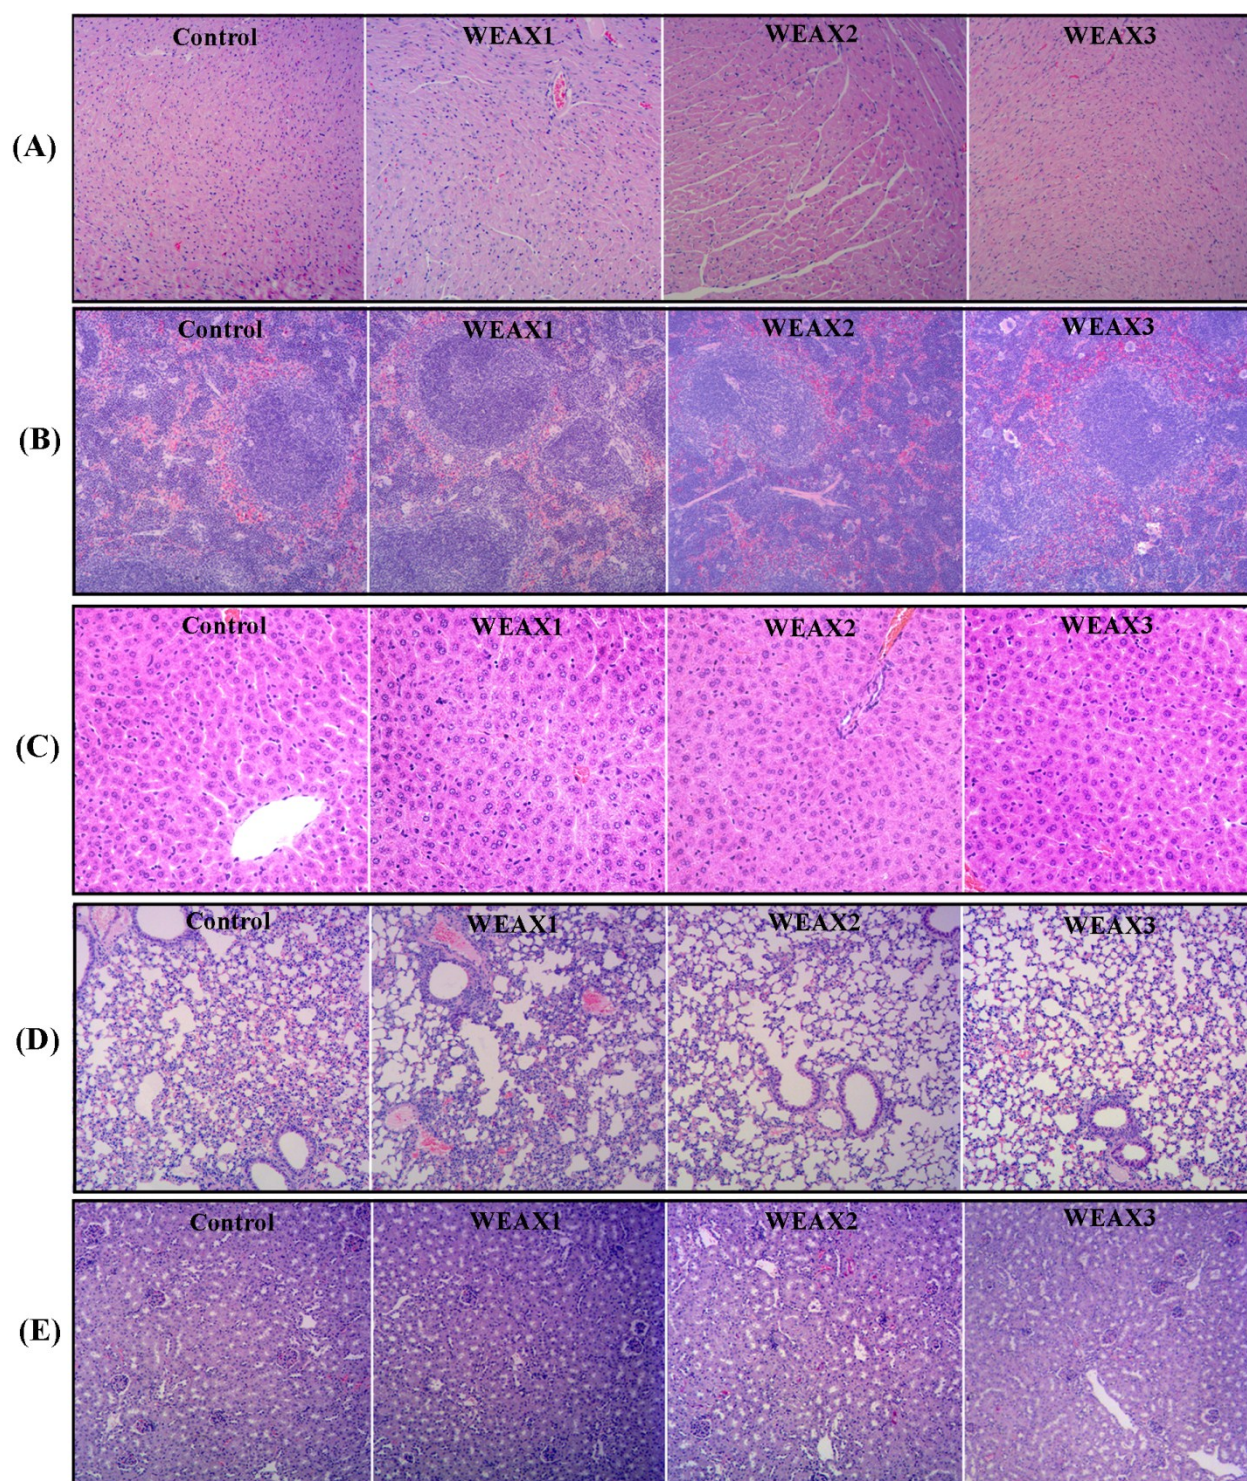

**Supplementary material 1. Histological alteration.**

Representative results are shown: Hearts (A); Spleens (B); Livers (C); Lungs (D); Kidneys (E).
